# Supplementary material
Source: ML conference proceedings conference paper supplement (https://openaccess.thecvf.com/content/ICCV2023/html/Wei_SurroundOcc_Multi-camera_3D_ICCV_2023_paper.html)
Supplement: Supplementary file 1 [file Wei_SurroundOcc_Multi-camera_3D_ICCV_2023_supplemental.zip]

Archive with 6 entries (6 files):
- 06283-supp.pdf
- code.zip
- demo-comparison.mp4
- demo-gt.mp4
- demo-nuscenes.mp4
- demo-wild.mp4
